# Supplementary material
Source: Springer Nature journal article supplement (https://www.springermedizin.de/resource/supplementary/12974_2009_214_MOESM4_ESM.pdf/9601046)
Supplement: MOESM4 [file 9601046]

**A**

COX-2  
(70kDa)

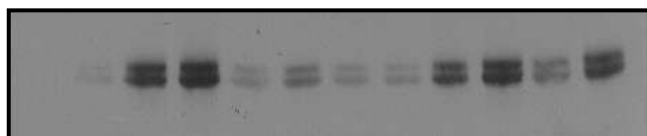

|                       |   |   |   |    |   |    |   |    |   |    |      |
|-----------------------|---|---|---|----|---|----|---|----|---|----|------|
| LPS 10ng/ml           | - | + | + | +  | + | +  | + | +  | + | +  | +    |
| NE $\mu$ M            | - | - | 1 | 10 | - | -  | - | -  | - | -  | -    |
| Phenylephrine $\mu$ M | - | - | - | -  | 1 | 10 | - | -  | - | -  | -    |
| Clonidine $\mu$ M     | - | - | - | -  | - | -  | 1 | 10 | - | -  | -    |
| Dobutamine $\mu$ M    | - | - | - | -  | - | -  | - | -  | 1 | 10 | -    |
| Terbutaline $\mu$ M   | - | - | - | -  | - | -  | - | -  | - | -  | 1 10 |

**B**

COX-2  
(70kDa)

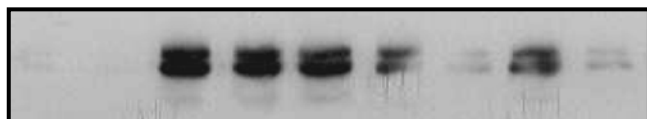

|                     |   |   |   |   |    |   |    |   |    |
|---------------------|---|---|---|---|----|---|----|---|----|
| LPS 10 ng/ml        | - | + | + | + | +  | + | +  | + | +  |
| NE 1 $\mu$ M        | - | - | + | + | +  | + | +  | + | +  |
| Nicergoline $\mu$ M | - | - | - | 1 | 10 | - | -  | - | -  |
| CGP 20712A $\mu$ M  | - | - | - | - | -  | 1 | 10 | - | -  |
| ICI 118,551 $\mu$ M | - | - | - | - | -  | - | -  | 1 | 10 |

**C**

COX-2  
(70kDa)

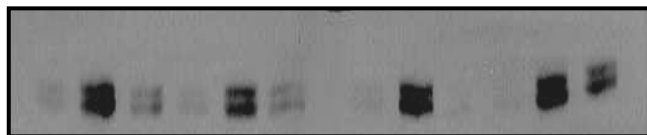

|                       |   |   |   |    |   |    |   |   |   |    |      |
|-----------------------|---|---|---|----|---|----|---|---|---|----|------|
| LPS 10 ng/ml          | - | + | + | +  | + | +  | + | + | + | +  | +    |
| Dobutamine 1 $\mu$ M  | - | + | + | +  | + | +  | - | - | - | -  | -    |
| Terbutaline 1 $\mu$ M | - | - | - | -  | - | -  | - | + | + | +  | +    |
| CGP 20712A $\mu$ M    | - | - | 1 | 10 | - | -  | - | - | 1 | 10 | -    |
| ICI 118,551 $\mu$ M   | - | - | - | -  | 1 | 10 | - | - | - | -  | 1 10 |
